# Supplementary material
Source: Research Square preprint supplement (doi:10.21203/rs.3.rs-9945394/v1)
Supplement: Supplementary file 1 [file c417d8e98db941905e665c2b.pdf]

## Supplement

**Table S1. Sediment- and plastic-associated microbiome enrichments in M9 minimal medium supplemented with a range of hydrophobic substrates. Numbers indicate weeks until visible change in turbidity was observed.**

| Substrate                       | Marine sediment sample (18 PSU) | Marine plastic particles (30 PSU) |
|---------------------------------|---------------------------------|-----------------------------------|
| Beeswax                         | 1                               | 1                                 |
| Paraffin wax                    | 4                               | 1                                 |
| Paraffin oil                    | 3                               | 1                                 |
| Octadecane                      | 17                              | 3                                 |
| Squalane                        | 9                               | —                                 |
| Low-Density Polyethylene (LDPE) | —                               | —                                 |
| PET (Powder)                    | —                               | —                                 |
| BHET                            | —                               | —                                 |

**Table S2. Nucleotide and amino acid sequences of the four candidate enzymes**

| Name                                        | Size    | Sequence                                                                                                                                                                                                                                                                                                                                                                                                                                                                                                                                                                                                                                                                                                                                                                                                                                                                                                                                                                                                                                                                                                                                                                                                                                                                                                                                                                                                                                                                                                                                                                                                                                                                                                                                                                                                                                                                                                                                                                                                                                                |
|---------------------------------------------|---------|---------------------------------------------------------------------------------------------------------------------------------------------------------------------------------------------------------------------------------------------------------------------------------------------------------------------------------------------------------------------------------------------------------------------------------------------------------------------------------------------------------------------------------------------------------------------------------------------------------------------------------------------------------------------------------------------------------------------------------------------------------------------------------------------------------------------------------------------------------------------------------------------------------------------------------------------------------------------------------------------------------------------------------------------------------------------------------------------------------------------------------------------------------------------------------------------------------------------------------------------------------------------------------------------------------------------------------------------------------------------------------------------------------------------------------------------------------------------------------------------------------------------------------------------------------------------------------------------------------------------------------------------------------------------------------------------------------------------------------------------------------------------------------------------------------------------------------------------------------------------------------------------------------------------------------------------------------------------------------------------------------------------------------------------------------|
| ABHETase 1 (JHONJODE_02731, DBEOMKNH_03626) | 1827 bp | <p>ATGTTCCCCATGGCAAATCCCTGGGACTGCTGGCCCTGTTC<br/> AGCCTGATCCTGACCGGCTGTGGCAGTGACAGCAGCAATGAT<br/> CGACCATCCCCACAACCCCTCTGACCGCAGCCACGCTGCAA<br/> GGCGAGGTCGCGGCCAGCAACGGGGCGCGAAAACGCCAC<br/> TGTCGATGGCACCCCTGCTGGTGTGGCGGGGCATACCTTATGC<br/> CCGCCCGCCAGTGGACGACCTGCGCTGGCGCGCACCGCAAC<br/> CGCCGAAAGCTGGAGCGGCGTGCGCGACGCCAGCGAGCC<br/> GGCATCCCGTTGCGTGCAGGCGGAAACCACCCGTCCTACTGGG<br/> TACGCACACAAAACATCATCGGCGACGAAGACTGCCTGTACC<br/> TGGATATCTACCGACCCAGCCGCGCTGACTGGCAACAGGAGC<br/> AATTGCCGTTTTATGTCTGGATTACGGTGGCTCCAATAACTT<br/> CGGCACCGCCATGGATTACGATGGCGGCAACCTGGCGCTGC<br/> ACGCCGACGCGGTGGTCGTGGTGTATCCAGTACCGGCTGGGG<br/> CCGCTGGGCTGGTTCTACCAACCGGAGGTCCAGACCGGCGG<br/> CGCCGACCCGCTGTCCGATTCCGGCAATTTCCGCAATCTGGA<br/> TCAGATACAGGCCCTGCGATGGGTGCGCGACAATGTGGCGG<br/> CCTTCGGCGGCGATCCCGATCAGATCACCATTGCCGCGAGT<br/> CCGCCGGCGGCCACAACGTGATGACGCTGCTGGTGTACCGG<br/> CAGGCACAAGGCCTGTTCCACAAGGCCATGGCACAAAGCCCG<br/> GCCATGGAGACCCGCTCGCCGGCGGAGGCCGAGGCCCTTAC<br/> CAACGAACAGATCGACTATCTGCTGCGCTACCGGGGTGACGC<br/> CGGGGACGCCGCGAAGCCGCCGCTGCGCCAGCAGATG<br/> GTGGACGATGGCACCCCTGGACGAATACCTGTTCCAGGTCCCG<br/> GCCATGACTACTACGCCGCGTCTTGGCCTACACCAGCCTG<br/> TCCGCTACGGCGCCACGGAAGACGGTGTGGTGGTGGCCAG<br/> CGGCGGCTGGATGCCGGCCATTCCGGCTGGCGAGTACAAC<br/> CCGTGCCCGTGATCATCGGCGCCAACGAATATGAGCAAAGG<br/> CGTTCATGCCCTTTATGGCGCCTTGGTGAAGGCCCTGTATG<br/> GCCAGCCTCCGGAGACTACACCTGGCTCAATCTGAAGGACG<br/> TAATGGAAGGGGAATCGAAAGCGGACGGCGCTCCGTTACCC<br/> TGGACGACGTGCTGCCACGGAGCGGATCGAACGATCTAC<br/> GAGTAGCCGGCTACCATGGCAGCCGCGCTGGCGCGCCAA<br/> GTATGTGGACGAACTGGCGGCGCGCTGGCACAACGGCAAG<br/> AAGACGTTTTTCGCCTATGATTTCCGCTGGGGCGGCCCGGTT<br/> CCGGGCCCGAACCTTTTCGACTTCATTTATGGCGCCGGACACT<br/> CCGCGGAAATTTTCACTTCCATGGCAGGGAAGAGGGTCTGT<br/> TCGGTTACCCGTTACCGCGGACAACGAAGCAGGGCGACGC<br/> GATCTGCAAGACGCGATGATGACCTATGTGAAGCACTTCCCTT<br/> GCCAAGGAGACCCAGCGATGGCTGCGATGGCGACTGCCCA<br/> CCACGCTGGATGCCATGGAGCGGCGAGGGCGGTGACACCGT<br/> CATCGTACTGGATGCCGACCGCGAACAGGCCACATAGCGAT<br/> GTCCGGCGAAGCGCTGACATTGGAAGCGTGGAGGAGGACC</p> |

---

GGGAAGCGGCGATCAGCGCTTACAACGAAGGGGAAAAGAAC  
GCCGTGCGGCATTTGCGCAGCCAGAGCCCCGGCCGGCGCC  
C

---

ABHETase 1 codon optimized for  
expression in E.coli  
(JHONJODE\_02731,  
DBEOMKNH\_03626)

1779 bp

CATATGTGTGGCAGTGACAGCAGCAATGATCGACCATCCCCA  
CAACCCCTCTGACCGCGACCACGCTGCAAGGCGAGGTGCG  
CGGCCAGCAACGGGCGCCGGAAAACGCCACTGTGATGGCA  
CCCTGCTGGTGTGGCGGGGCATACCTTATGCCCGCCCGCCA  
GTGGACGACCTGCGCTGGCGCGCACCGCAACCCGCGGAAAG  
CTGGAGCGGCGTGCAGCGACGCCAGCGAGCCGGCATCCCGTT  
GCGTGCAGGCGGAAACCACCCGTCCTGACTGGGTACGCACACAAA  
ACATCATCGGCGACGAAGACTGCCTGTACCTGGATATCTACC  
GACCCAGCCGCGCTGACTGGCAACAGGAGCAATTGCCGTTT  
ATGTCTGGATTCACGGTGGCTCCAATAACTTCGGCACCCGCCAT  
GGATTACGATGGCGGCAACCTGGCGCTGCACGCCGACGCGG  
TGGTGTGGTATCCAGTACCGGCTGGGGCCGCTGGGCTGG  
TTCTACCAACCGGAGGTCCAGACCGGCGGCGCCGACCCGCT  
GTCCGATTCCGGCAATTTCCGGCAATCTGGATCAGATACAGGC  
CCTGCGATGGGTGCGCGACAATGTGGCGGCCCTTCGGCGGGC  
ATCCCGATCAGATCACCATTGCCGGCGAGTCCGCCGGCGGC  
CACAACGTGATGACGCTGCTGGTGTACCCGACGGCACAAGGC  
CTGTTCCACAAGGCCATGGCACAAGCCCGGCCATGGAGACC  
CGCTCGCCGGCGGAGGCCGAGGCCCTTACCAACGAACAGAT  
CGACTATCTGCTGCGCTACCGGGGTGACGCCGGGACGCCG  
GCGAAGCCGCGCCCTGCGCCAGCAGATGGTGGACGATGGC  
ACCCTGGACGAATACCTGTTCCAGGTCCCGGCCCATGACTAC  
TACGCCCGCGTCTGGCCTACACCAGCCTGTCCGCCTACGGC  
GCCACGGAAGACGGTGTGGTGGTGCCAGCGGCGGCTGGAT  
GCCGGCCATTCCGGCTGGCGAGTACAACCTCCGTGCCCGTGT  
CATCGGCGCCAACGAATATGAGCAAAAGGCGTTTCATGCCCT  
TTATGGCGCCTTGGTGAAAGCCCTGTATGGCCAGCCTTCCGG  
AGACTACACCTGGCTCAATCTGAAGGACGTAATGGAAGGGGA  
ATCGAAAGCGGACGGCGCTCCGTTACCCTGGACGACGTGCT  
GCCACGGAGCGGGATCGAACGATCTACGAGCTAGCCGGCT  
ACCATGGCAGCCGCGCCTGGCGCGCCAAGTATGTGGACGAA  
CTGGCGGCGGCGCTGGCACAACGGCAAGAAGACGTTTTTCGC  
CTATGATTTCCGCTGGGGCGGCCCGTTCCGGGCGGAAAC  
CTTTGACTTTCATTTATGGCGCCGGACACTCCCGGAAAATTC  
ATTCTTCCATGGCAGGGAAGAGGGTCTGTTCCGTTACCCGTT  
CACCGCGACAACGAAGCAGGGCGACGCGATCTGCAAGACG  
CGATGATGACCTATGTGAAGCACTTCCTTCGCCAAGGAGACC  
CCAGCGATGGCTGCGATGGCGACTGCCACCACGCTGGATG  
CCATGGAGCGGCGAGGGCGGTGACACCGTCATCGTACTGGA  
TGCCGACCGCAACAGGCCACATAGCGATGTCCGGCGAAG  
CGCTGACATTGAAAGCGTGGAGGAGGACCGGGAAGCGGCG  
ATCAGCGCTTACAACGAAGGGGAAAAGAACGCCGTGCGGCAT  
TTCGCCAGCCAGAGCCCCCTGGCCGGCGCCCCCTCGAG

ABHETase 1 (JHONJODE\_02731,  
DBEOMKNH\_03626)

609 AA

---

MFPHGKSLGLLALFSLILTGCGSDSSNDRPSPQPPLTATTLQGEV  
AGQQRAPENATVDGTLVWRGIPYARPPVDDLRLWRAPPPESW  
SGVRDASEPASRCVQAETTRHWVRTQNIIGDEDCLYLDIYRPSR  
ADWQQEQLPVYVWIHGGSNFMTAMDYDGGNLALHADAVVVVI  
QYRLGPLGWIFYQPEVQTGGADPLSDSGNFGNLDQIQALRWVRD  
NVAAFGGDPDQITIAGESAGGHNVMTLLVSPQAQGLFHKAMAQS  
PAMETRSPAEEAFTNEQIDYLLRYRGDAGDAGEAAALRQQMV  
DDGTLDEYLFQVPAHDYAAVLAYTSL SAYGATEDGVVVPSSG  
WMPAIRAGEYNSVPVIIGANEYEKAFMPLYGALVKALYGQPSG  
DYTWLNLKDVMEGESKADGAPFTLDDVLPTRDRTIYELAGYHG  
SRAWRAKYVDELAALAQRQEDVFAYDFRWGGPGSGPEPFDI  
YGAGHSAEISFFHGREEGLFGYPFTADNEAGRRLQDAMMTYV  
KHFLRQGDPSDGDGDCPPRWMPWSGEGGDTVIVLDADREQA  
HIAMSGEALTLESVEEDREAASAYNEGEKNAVRHFASQSPWPA  
P

---

ABHETase 1 codon optimized for  
expression in E.coli  
(JHONJODE\_02731,  
DBEOMKNH\_03626)

593 AA

HMCGSDSSNDRPSPQPPLTATTLQGEVAGQQRAPENATVDGTL  
LVWRGIPYARPPVDDLRRWRAPQPPEWSGVRDASEPASRCVQA  
ETTRHWVRTQNIIGDEDCLYLDIYRPSRADWQQEQLPVYVWIHG  
GSNNFGTAMDYDGGNLALHADAVVVVIQYRLGPLGWIFYQPEVQ  
TGGADPLSDSGNFGNLDQIQALRWVRDNVAAFGGDPDQITIAGE  
SAGGHNVMTLLVSPQAQGLFHKAMAQSPAMETRSPAEEAFTN  
EQIDYLLRYYRGDAGDAGEAAAALRQQMVDDGTLDEYLFQVPAHD  
YYAAVLAYTSL SAYGATEDGVVVPSSGGWMPAIRAGEYNSVPVIIG  
ANEYEQKAFMPLYGALVKALYGQPSGDYTWLNLKDVMEGESKA  
DGAPFTLDDVLPTRDRTIYELAGYHGSRAWRAKYVDELAALA  
QRQEDVFAYDFRWGGPGSGPEPFDIYAGHSAEISFFHGREE  
GLFGYPFTADNEAGRDLQDAMMTYVKHFLRQGDPSDGCDDG  
CPPRWMPWSGEGD TVIVLDADREQAHIAMSGEALTLESVEED  
REAAISAYNEGEKNAVRHFASQSPWPAPLE

ABHETase 2 (JHONJODE\_01413)

1665 bp

ATGAGCAACGAGAACGAGCAGAATCAGAACCACCGCGCCG  
GCTCCAGCGGCGAAAAAGAAAAAGGCCGCCACCCGCAAGGC  
GGCAGCCAGGCCAGCTGCGAAAAAGCCGCGGTGAAGCGTG  
AAGCCACGGCACGGAAGAAAGCCGTGGCCGCCAAATCCAGC  
CGCCGTAGCGACGCGCAAAGCAAACGCAATGCGGTGAAAGA  
GGCGTCCGTGGTCATCGTGGGCGCAGGTTTCGCCGGTCTGG  
GCATGGCGATCCGGCTTCGTCAGGCGGGCGTGGATGATTTCC  
TGCTGTTGGAGCGTGCCGACAAGGTGGGCGGCACCTGGCGT  
GACAACACCTATCCGGGCGCCGCTGCGATATTCCTTCTCAC  
TTGTATTCCTATTCCTTCGCGCCGAATCCGCATTGGTCCCGGC  
ACTTTTCCGGCAGTGACGAGATCCTGGGTACATCGAGCACC  
TGGTGAAACAGTACGGTTTGCGTGACAAGATTCACATCCAGCA  
GGACGTCACCGATGCGCGCTTCGATGAAACGAAAGGCCAATG  
GCGTGTGGATACCCGCCAGGGCGATGTCTGGCAGGGGCGGG  
CGGTGGTCATGGCCCAGGGGCGCTTTCCAATGCCAGCTTTC  
CGGACATCGAGGGCCTGACAGACTTTAAAGGCAAGCGCATCC  
ATAGTGCCCGCTGGAATCACGATTACGATTTCTCCGGCAAGC  
GGGTGGCGGTGATTGGCACCGGTGCCAGCGCCGTGCAGATC  
ATTCCGGAATTGGCGAAAACCGCCGGTACCCTGAAAGTGTTT  
CAGCGCACCCCGGCCTGGGTGATTCCACGCCCGGATTACGC  
CACTCCGACTGGAACAAAGCGCTGTTCCGAGAAGCTGCCACT  
GACCCGTAAGGCCATGCGCCAGGCGCTGTACTGGACGCATG  
AAACCATGGCGCTGGCGGTGATCTGGAATTCGCCGCTGACGC  
GCCTGGCGGAGCGGCTCAGCCTGATGCACCTGCGTAGCCAG  
GTGAAGGACGACTGGATGCGCCGGCAATTGACGCCGGATTTCC  
CGCATCGGTTGTAAACGGGTTTTGCTCTCCAACGATTAATC  
CGGCCCTGCAACGGGACAACGTGGACCTGATCACCTGGCCC  
ATTGCCCGCATCGCCGAGAACGGTGTCCGCACCTGTGACGGC  
ATCGAACACCAATTCGATTGCATCGTCTTCGCCACCGGCTTTG  
ATGTGCCCAAGAGCGGCACGCCGTTCCCGATCCGTGGTCTCA  
ATGGCCGTGAGCTGGGAGAGGAGTGGTCCGGCGGCGCGCG  
GGCTACAAGAGCGTCAGCGTGGCAGGCTATCCGAACCTGTT  
CTTTACCTTCGGGCCCAACTCCGGTCTGGTCATAATTCGGC  
GCTGGTTTATATGGAAGCGCAACTGGACTATGCGGTGGAGGG  
CATTGCGCCGATTCTCGATCATGACCTGAAGATCCTGGACGTG  
CGCGAGAGTGTGCAGCAGCGTCATAATCGCCATTTGCAAAAAG  
CGGCTGGCCAGGACCAACTGGAACCTCCGGGTGTAAGGCTG  
GTATCTGACGGAGGATGGCTATAACGCCACCATGTACCCGGG  
CTTCGCCAGCCAGTACC CGCGTCAGATGTCCCGGTTCTGTGGA  
TCAGCACTATCGGCGGGTGCCGCAAACCGGGAGCGCG

|                                                                             |                |                                                                                                                                                                                                                                                                                                                                                                                                                                                                                                                                                                                                                                                                                                                                                                                                                                                                                                                                                                                                                                                                                                                                                                                                                                                                                                                                                                                                                                                                                                                                                                                                                                                                                                                                       |
|-----------------------------------------------------------------------------|----------------|---------------------------------------------------------------------------------------------------------------------------------------------------------------------------------------------------------------------------------------------------------------------------------------------------------------------------------------------------------------------------------------------------------------------------------------------------------------------------------------------------------------------------------------------------------------------------------------------------------------------------------------------------------------------------------------------------------------------------------------------------------------------------------------------------------------------------------------------------------------------------------------------------------------------------------------------------------------------------------------------------------------------------------------------------------------------------------------------------------------------------------------------------------------------------------------------------------------------------------------------------------------------------------------------------------------------------------------------------------------------------------------------------------------------------------------------------------------------------------------------------------------------------------------------------------------------------------------------------------------------------------------------------------------------------------------------------------------------------------------|
| <p>ABHETase 2 codon optimized for expression in E.coli (JHONJODE_01413)</p> | <p>1461 bp</p> | <p>CATATGGTCATCGTGGGCGCAGGTTTCGCCGGTCTGGGCATG<br/> GCGATCCGGCTTCGTCAGGCGGGCGTGGATGATTCCTGCTG<br/> TTGGAGCGTGCCGACAAGGTGGGCGGCACCTGGCGTGACAA<br/> CACCTATCCGGGCGCCGCCTGCGATATTCCTTCTCACTTGTAT<br/> TCCTATTCCTTCGCGCCGAATCCGCATTGGTCCCGGCACTTTT<br/> CCGGCAGTGACGAGATCCTGGGTTACATCGAGCACCTGGTGA<br/> AACAGTACGGTTTGCCTGACAAGATTCCTCCAGCAGGACGT<br/> CACCGATGCGCGCTTCGATGAAACGAAAGGCCAATGGCGTGT<br/> GGATACCCGCCAGGGCGATGTCTGGCAGGGGCGGGCGGTG<br/> GTCATGGCCCAGGGGCGCTTTCCAATGCCAGCTTTCCGGAC<br/> ATCGAGGGCCTGACAGACTTTAAAGGCAAGCGCATCCATAGT<br/> GCCCCGCTGGAATCACGATTACGATTTCTCCGGCAAGCGGGTG<br/> GCGGTGATTGGCACCGGTGCCAGCGCCGTGCAGATCATTCC<br/> GGAATTGGCGAAAACCGCCGGTACCCTGAAAGTGTTCAGCG<br/> CACCCCGGCCTGGGTGATTCCACGCCCGGATTACGCCACTCC<br/> GGACTGGAACAAAGCGCTGTTTCGAGAAGCTGCCACTGACCCG<br/> TAAGGCCATGCGCCAGGCGCTGTACTGGACGCATGAAACCAT<br/> GGCGCTGGCGGTGATCTGGAATTCGCCGCTGACGCGCCTGG<br/> CGGAGCGGCTCAGCCTGATGCACCTGCGTAGCCAGGTGAAG<br/> GACGACTGGATGCGCCGGCAATTGACGCCGGATTTCCGCATC<br/> GGTTGTA AACGGGTTTTGCTCTCCAACGATTACTATCCGGCCC<br/> TGCAACGGGACAACGTGGACCTGATCACCTGGCCCATTGCCC<br/> GCATCGCCGAGAACGGTGTCCGCACCTGTGACGGCATCGAAC<br/> ACCAATTCGATTGCATCGTCTTCGCCACCGGCTTTGATGTGCC<br/> CAAGAGCGGCACGCCGTTCCCGATCCGTGGTCTCAATGGCCG<br/> TGAGCTGGGAGAGGAGTGGTCCGGCGGCGCGGGCCTACA<br/> AGAGCGTCAGCGTGGCAGGCTATCCGAACCTGTTCTTTACCTT<br/> CGGGCCCAACTCCGGTCCCTGGTCATAATTCGGCGCTGGTTTA<br/> TATGGAAGCGCAACTGGACTATGCGGTGGAGGGCATTGCCCC<br/> CATTCTCGATCATGACCTGAAGATCCTGGACGTGCGCGAGAG<br/> TGTGCAGCAGCGTCATAATCGCCATTTGCAAAAAGCGGCTGGC<br/> CAGGACCAACTGGAACCTCCGGGTGAAAAGCTGGTATCTGAC<br/> GGAGGATGGCTATAACGCCACCATGTACCCGGGCTTCGCCAG<br/> CCAGTACCGCCGTGAGATGTCCCGGTTCTGGATCAGCACTA<br/> TCGGCGGGTGCCGCAAACCGGGAGCGCGCTCGAG</p> |
| <p>ABHETase 2 (JHONJODE_01413)</p>                                          | <p>555 AA</p>  | <p>MSNENEQNQNTTAPAPAAKKKKAATRKAARPAAKKAAVKREAT<br/> ARKKAVAAKSSRRSDAQSKRNAVKEASVVIVGAGFAGLGM AIRL<br/> RQAGVDDFVLLERADKVG GTWRDNTYPGAACDIPSHLYS SFAP<br/> NPHWSRHFSGSDEILGYIEHLVKQYGLRDKIH FQQDVT D ARFDET<br/> KGQWRVDTRQGDVWQGRAV VMAQG PLSNASFPDIEGLTDFKG<br/> KRIHSARWNHDYDFSGKRVA VIGTGASAVQIIP ELAKTAGTLKVF<br/> QRTPAWVIPRPDYATPDWNKALFEKLP LTRKAMRQALY WTHET<br/> MALAVIWN SPLTRLAERLSMHLRSQVKDDWMRRQLTPDFRIGC<br/> KRVLLSNDYYPALQRDNVDLITWPIARIAENGVRTCDGIEHQFDCI<br/> VFATGFDVPKSGTPFPIRGLNGRELGEESGGARAYKSVSVAGY<br/> PNLFFTFGPNSGPGHNSALVYMEAQLDYAVEGIRRLDHLKILD<br/> VRESVQQRHNRHLQKRLARTNWN S GCKSWYLTEDGYNATMYP<br/> GFASQYRRQMSRFVDQH YRRVPQTGSA</p>                                                                                                                                                                                                                                                                                                                                                                                                                                                                                                                                                                                                                                                                                                                                                                                                                                                                                                                                                                                                                                                                  |
| <p>ABHETase 2 codon optimized for expression in E.coli (JHONJODE_01413)</p> | <p>487 AA</p>  | <p>HMVIVGAGFAGLGM AIRLRQAGVDDFVLLERADKVG GTWRDNT<br/> YPGAACDIPSHLYS SFAPNPHWSRHFSGSDEILGYIEHLVKQY G<br/> LRDKIH FQQDVT D ARFDETKGQWRVDTRQGDVWQGRAV VMAQ<br/> GPLSNASFPDIEGLTDFKGKRIHSARWNHDYDFSGKRVA VIGTGA<br/> SAVQIIP ELAKTAGTLKVFQRTPAWVIPRPDYATPDWNKALFEKLP<br/> LTRKAMRQALY WTHETMALAVIWN SPLTRLAERLSMHLRSQVK</p>                                                                                                                                                                                                                                                                                                                                                                                                                                                                                                                                                                                                                                                                                                                                                                                                                                                                                                                                                                                                                                                                                                                                                                                                                                                                                                                                                                                                              |

---

DDWMRRQLTPDFRIGCKRVLLSNDYYPALQRDNVDLITWPIARIA  
ENGVRTCDGIEHQFDCIVFATGFDVPSKSGTFFPIRGLNGRELGEE  
WSSGARAYKSVSVAGYPNLFSTFGPNSGPGHNSALVYMEAQLD  
YAVEGIRRILDHDLKILDVRESVQQRHNRHLQKRLARTNWNSGC  
KSWYLTEDGYNATMYPGFASQYRRQMSRFVDQHYRRVPQTGS  
ALE

---

ABHETase 3 (JHONJODE\_00892) 1998 bp

ATGCTCAAGCAGGTCCCCACCGGCGTCAGCGGTACTIONCCACC  
GCCGTGATCGCCTTTTTATCCTCGTTATTGCTCTTGATGTCCG  
GGTGCGGTGGCTCATCGTCATCGGATTCCGACAGAGAGCCAC  
TTTCCGGTCTGTTTCGGCGCCCTTCCAATATCCGGCGTCAGCTA  
CCGGCAGGGTGACGCGCCATGGCGAACTACCGGCGAGTTGG  
GTCAATTCCACTATACCGGGGATGAGACACTCACCTTCGCCCT  
CGGCGATCTGACCCTGGGAAGCACCTCCGGAGCAAAGCACT  
CACCGTCGCCAATCTATCGCCCGCTGCCACACCGGCGGAGAC  
GCCGGCGATGATCAATACCCTGGTGCTGCTGCAAACCTGGA  
TGCCGACGGCAGCCTTCATAATGGTATTACAGATTACACCACGG  
ATCCGGGAACGGGTTTCCGAGCAGGCCGCCAGCCTGACTTTG  
GATCAGCCACCCCGATTTCAACGCCGCCCTGCAAAGTGTA  
GTGGATGATCTGGAAGTGCCGGCGCCTTCTCCGATACCGAT  
TCCAGAGCCCGTTCGGCTGACCACGCCCGATGATGCGGAGGA  
GAACTTCCAACGTGCCGTCTCCCCCGCCGGTTGGTTGAAAC  
CAACGGCGGTGAGCTCAGTGGCTTCCAAGCCGATGAACATAC  
CTGGCAGTTTCTTGGCATCCCCTATGCGAAACCGCCATTGGG  
CGAACTGCGCTGGCGCCCGCCGGTGGATCCCGAGCCGTGGT  
CCGGCATCCGCCACGCCGTTGCCTGGAGCGATCAGGCCGCG  
CAAAACACCGCCCTGGAACGGTTCGGTGAGGGCGGCATGAG  
TGAAGATTCGCTTTATCTCAATGTGACGGCACCGAAGAACGCC  
GATGGCCTGCCGGTATGGTCTGGTTTCATGGCGGAGGCTTC  
ACCGCCTTGACCAGTAACACCAAGCCATTCAATAACCCGCGAG  
GCAGTGCCGAGCAAAGGCGTGGTACAGGTCTCGGTTAACCAC  
CGGCTGGGGCCGTTTCGGCTATATCGCACACCCCGAGTTGAGT  
GCGGAGAGCGGTTATAACGGCTCGGGCAACTACGGACAAATG  
GACCTGATCGCGGCCCTTGGAGTGGGTGCGTGACAACATTGAA  
GCCTTTGGTGGAGATCCCGGTAACGTACCATATTCCGAGAA  
TCCGGTGGCGGCCGCAAAGTGCTGTGCTTAATGGCCTCTCCC  
CGCGCCGCCGGCCTGTTCCATCGGGCGATCAGCCAGAGTGG  
CACGCTCTATCCGATACCCGTACCCTGGCGGCCCGCCGAGG  
CCGTCGGTAGCCAACTGCAAACGAACTGGACGCTTCGTCTC  
TGGCTGAGATGCGCCAGAAGAGCTGGCAGGAAGTAGCGGCT  
GCCGCGGCGACGCTGGCGCCCTACACCAACATTGACAACCAC  
TATCTACCCTACGCCGAACGCGTCGCTTTTCAATCCGGCAATC  
AGAACGACGTGCCGTTTATGTTTCAAGTATCAACGCCAACGATAC  
CCCGGACCCCAACATACCGCCATTGAGGTGTTTCCCTGGAT  
GGCGCCACTGTGTTCCGGCAATCACTACGCCACCTATTTCACT  
CACCAGCCCGCTGGCTGGAAAGCCCGGGGCGTGGAAGCCTA  
CCACGCCGCCGAACTGGCCTATCTGTTCAACATGCCAGAGAG  
CGTCATCACCCACTACCTGCTGGGCCTGGTCATCGATCCGGC  
AACCGGCGATTGTTGGTTCATTGATGATCTCAACGGCAACGG  
CGTGTCCGGATCCCAAGGCGATCCCGCCGATATTCTTGCCTC  
CGCCGTTTCGACCAGACCGATCAGGCGGTAATCGATCGCAT  
GCTCACCATCTGGACCAACTTCGAAAAACCGGCGATCCGAG  
CATTGAGGGTGACATCGACTATCCGCTTTATGACGCGGCCAG  
TGAAAGCTATGTGAAATAGGCGCCAACAGCGAAGCGAAGAC  
CGGCCTCGGCAGTGTGCTGAGTGAC

---

ABHETase 3 codon optimized for  
expression in E.coli  
(JHONJODE\_00892)

1923 bp

---

CATATGTGCGGTGGCTCATCGTCATCGGATTCCGACAGAGAG  
CCACTTTCCGGTCTGTTCCGGCGCCCTTCCAATATCCGGCGTC  
AGCTACCGGCAGGGTGACGCGCCATGGCGAACTACCGGCGA  
GTTGGGTCAATTCCACTATACCGGGGATGAGACACTCACCTTC  
GCCCTCGGCGATCTGACCCTGGGAAGCACCTCCGGAGCAAAA  
GCACTACCGTCGCCAATCTATCGCCCCGCTGCCACACCGGCG  
GAGACGCCGCGGATGATCAATACCCTGGTGCTGCTGCAAACC  
CTGGATGCCGACGGCAGCCTTCATAATGGTATTAGATTACAC  
CACGGATCCGGGAACGGGTTTCCGAGCAGGCCGCCAGCCTG  
ACTTTGGATCAGCCCACCCCGATTTCAACGCCGCCCTGCAA  
AGTGTAGTGGATGATCTGGAAAGTGCCGGCGCCTTCTCCGAT  
ACCGATTCCAGAGCCCGTCGGCTGACCACGCCCGATGATGCG  
GAGGAGAACTTCCAACGTGCCGTCTCCCCCGCCGGTTGGTT  
GAAACCAACGGCGGTCAGCTCAGTGGCTTCCAAGCCGATGAA  
CATACTGGCAGTTTCTTGGCATCCCCTATGCGAAACGCCCAT  
TGGGCGAACTGCGCTGGCGCCCGCCGGTGGATCCCGAGCCG  
TGGTCCGGCATCCGCCACGCCGTTGCCTGGAGCGATCAGGC  
CGCGCAAAACACCGCCCTGGAACGGTTCGGTGAGGGCGGCA  
TGAGTGAAGATTCGCTTTATCTCAATGTGACGGCACCGAAGAA  
CGCCGATGGCCTGCCGGTATGGTCTGGTTTCATGGCGGAG  
GCTTCACCGCGTTGACCAGTAACACCAAGCCATTCAATAACCC  
GCAGGCAGTGGCGAGCAAAGGCGTGGTACAGGTCTCGGTTA  
ACCACCGGCTGGGGCCGTTCCGGCTATATCGCACACCCCGAGT  
TGAGTGCGGAGAGCGGTTATAACGGCTCGGGCAACTACGGAC  
AAATGGACCTGATCGCGGCCTTGGAGTGGGTGCGTGACAACA  
TTGAAGCCTTTGGTGGAGATCCCGGTAACGTCACCATATTCGG  
AGAATCCGGTGGCGGCCGCAAAGTGCTGTGCTTAATGGCCTC  
TCCCCGCGCCGCCGGCCTGTTCCATCGGGCGATCAGCCAGA  
GTGGCACGCTCTATCCGGATAACCGTACCCTGGCGGCCGCC  
GAGGCCGTCGGTAGCCAACTGCAAAGTGAAGTGGACGCTTCG  
TCTCTGGCTGAGATGCGCCAGAAGAGCTGGCAGGAAGTAGCG  
GCTGCCGCGGCGACGCTGGCGCCCTACACCAACATTGACAAC  
CACTATCTACCCTACGCCGAACGCGTCGCTTTCGAATCCGGC  
AATCAGAACGACGTGCCGTTTATGTTTCAAGTATCAACGCCAACG  
ATACCCCGGACCCACCAATACCGCCATTGAGGTGTTTTCCCT  
GGATGGCGCCACTGTGTTCCGGCCAATCACTACGCCACCTATT  
TCACTACCCAGCCCGCTGGCTGGAAAGCCCGGGCGTGGAA  
GCCTACCACGCCGCCAACTGGCCTATCTGTTCAACATGCCA  
GAGAGCGTCATCACCCACTACCTGCTGGGCCTGGTCATCGAT  
CCGGCAACCGGCGATTTCGTTGGTCAATTGATGATCTCAACGGC  
AACGGCGTGTCCGGATCCCAAGGCGATCCCGCCGATATTCTT  
GCCTCCGCCGTTTTGACCAGACCGATCAGGCGGTAATCGAT  
CGCATGCTCACCATCTGGACCAACTTCGAAAAACCGGCGAT  
CCGAGCATTGAGGGTGACATCGACTATCCGCTTTATGACGCG  
GCCAGTAAAAGCTATGTGAAAATAGGCGCCAACAGCGAAGCG  
AAGACCGGCCTCGGCAGTGTGCTGAGTGACCTCGAG

ABHETase 3 (JHONJODE\_00892)

666 AA

---

MLKQVPHRRQRYSTAVIAFLSSLLLLMSGCGGSSSSSDSDREPLS  
GLFGALPISGVSYRQGDAPWRTTGELGQFHYTGDDELTFALGDL  
TLGSTGAKALTVANLSPAATPAETPAMINTLVLLQTLADGSLH  
NGIQITPRIRERVSEQAASLTLQPTPDFNAALQSVVDDLESAGA  
FSDTDSRRARLTTPDDAENFQRAVSPRRLVETNGGQLSGFQA  
DEHTWQFLGIPYAKPPLGELRWRPPVDPEPWSGIRHAWAWSQ  
AAQNTALERFGEFGMSEDSLYLNVTAPKNADGLPVMWVWHGGG  
FTALTSNTKPFNNPQAVASKGVVQVSVNHRLGPFYIAHPELSAE

---

|                                                                                       |         |                                                                                                                                                                                                                                                                                                                                                                                                                                                                                                                                                                                                                                                                                                                                                                                                                                                                                                                                                                                                                                                                                                                                                                                                                                          |
|---------------------------------------------------------------------------------------|---------|------------------------------------------------------------------------------------------------------------------------------------------------------------------------------------------------------------------------------------------------------------------------------------------------------------------------------------------------------------------------------------------------------------------------------------------------------------------------------------------------------------------------------------------------------------------------------------------------------------------------------------------------------------------------------------------------------------------------------------------------------------------------------------------------------------------------------------------------------------------------------------------------------------------------------------------------------------------------------------------------------------------------------------------------------------------------------------------------------------------------------------------------------------------------------------------------------------------------------------------|
|                                                                                       |         | <p>SGYNGSGNYQMDLIAALEWVRDNIEAFGGDPGNVTIFGESGG<br/> GRKVLSLMASPRAAGLFHRAISQSGTLYPDTRTLAAAEAVGSQL<br/> QTELDASSLAEMRQKSWQEVAATAATLAPYTNIDNHLYPYAERV<br/> AFESGNQNDVPMFMSINANDTPDPTNTAIEVFPWMAPLCSANHY<br/> ATYFTHQPAGWKARGVEAYHAAELAYLFNMPESVITHYLLGLVID<br/> PATGDSLVIDDLNNGVSGSQGDPADILASAGFDQTDQAVIDRM<br/> LTIWTNFAKTGDPSIEGDIDYPLYDAASESYVEIGANSEAKTGLGS<br/> VLSD</p>                                                                                                                                                                                                                                                                                                                                                                                                                                                                                                                                                                                                                                                                                                                                                                                                                                                                |
| <p>ABHETase 3 codon optimized for<br/> expression in E.coli<br/> (JHONJODE_00892)</p> | 641 AA  | <p>HMCSSSSSDSDREPLSGLFGALPISGVSYRQGDAPWRTT<br/> GELGQFHYTGDETLTFALGDLTLGSTSGAKALTVANLSPAATPAETPA<br/> MINTLVLLQTLADGSLHNGIQITPRIRERVSEQAASLTLDQPTPD<br/> FNAALQSVVDDLESAGAFSDTDSRARRLTTPDDAEENFQRAVSP<br/> RRLVETNGGQLSGFQADEHTWQFLGIPYAKPPLGELRWRPPVD<br/> PEPWSGIRHAVAWSQAAQNTALERFEGGMSSEDSLYLNVTPA<br/> KNADGLPVMVWFHGGGFTALTSNTKPFNNPQAVASKGVVQVSV<br/> NHRLGPFYIAHPELSAESGYNGSGNYQMDLIAALEWVRDNIE<br/> AFGGDPGNVTIFGESGGGRKVLSLMASPRAAGLFHRAISQSGTL<br/> YPDTRTLAAAEAVGSQLQTELDASSLAEMRQKSWQEVAATAATL<br/> APYTNIDNHLYPYAERVAFESGNQNDVPMFMSINANDTPDPTNTA<br/> IEVFPWMAPLCSANHYATYFTHQPAGWKARGVEAYHAAELAYLF<br/> NMPESVITHYLLGLVIDPATGDSLVIDDLNNGVSGSQGDPADILA<br/> SAGFDQTDQAVIDRMLTIWTNFAKTGDPSIEGDIDYPLYDAASES<br/> YVEIGANSEAKTGLGSVLSGLE</p>                                                                                                                                                                                                                                                                                                                                                                                                                                                                                   |
| <p>PBHETase 1 (P_005068)</p>                                                          | 1044 bp | <p>ATGACCATTGCACGCTGCGTGTGGCGCTGGTCTTGCTCGGC<br/> GGCCTGTTGGTCCGCGCCGAGGCCGCGCCGTGGGTTGCCGG<br/> CCTGCACCTTATGACCTTGACCGACCCGTCGATAGCCGCC<br/> AATGCAAGCGCTTGCCTTCTACCCGGCCATTGGCAAGACCCG<br/> TCGCAGCCGAATAGACGGGTATCCCGTCGATGTGGCCGAAGA<br/> GGCGCCCGTCGCCATGGGCCGATTCCCGTTGCTGGTGCTGT<br/> CTCACGGCAATACGGGCAGCCATTGGCCTTGATTACCTGG<br/> CCACGTCGCTGGCGCGCAAGGGTTCGTGGTGGTGGCGGTT<br/> GTGCACCCGGGGGACAACGTGCGCGACCACAGTCGCTTGG<br/> CACCTGAGCAACCTTTATGGACGGCCGCTACAACCTCAGCGC<br/> GGCGATCACCGCAGCGCGCGCTGATAGGGTGGTCCGGCCTT<br/> ATCTGAACGAAGGCAAGGTGGGGTTATCGGCTACTCGGCCG<br/> GCGGAGAAACCGCGTTGATCCTGTCTGGTGCACGCCCCGATC<br/> TGGACCGTCTGCGTCACTGCTGCTGGAGCGCCCGAAGGAC<br/> GCAGACGCCTGCAAAACCCACGGCATACTGATTGCCGACCGC<br/> AGCGAACTGGCGCCTGAGACCGACCCGCGAGTGGGGGCGGT<br/> CATGTTGATGGCGCCGCTGAGCCTGTTGTTCCGGGCGCCATGC<br/> CTTGGCCGGGTACAGGTACCCGTGCTGATCTACAGTGGCGA<br/> CAGCGATCAGCTTGTGGCTGTGGACCGTAATGCCGAGGCCCT<br/> GGCCCGCAAACCTGCCGTCACACCGGACTACCGCCTGTTGG<br/> CCGGTGCCGGGCACTTCGTATTCATGGCCCGTTGCGATGCCG<br/> AGCAGTACGCGCGGATGGCAGCGCTGTGCAAGGATGCCGAT<br/> GGCGTCGACCGCCGGCATATCCATCGCTCGCTGCAGCGAGA<br/> AACGGCGGCGTTCTTCAGCCAGGCGCTGGGTGCGCCAGCGC<br/> CGGCTGAGCGTTCAGCTGCGACGGGCGCGCCGCGCCAGCAA<br/> CAACGT</p> |
| <p>PBHETase 1 codon optimized for<br/> expression in E.coli (P_005068)</p>            | 990 bp  | <p>CATATGGCGCCGTGGGTTGCCGGCCTGCACCTTATGACCTTG<br/> ACCGACCCGGTCGATAGCCGCCAATGCAAGCGCTTGGCTTC<br/> TACCCGGCCATTGGCAAGACCCGTCGAGCCGAATAGACGG<br/> GTATCCCGTCGATGTGGCCGAAGAGGCGCCGTCGCCATGG<br/> GCCGATTCCCGTTGCTGGTGTCTCACGGCAATACGGGCA<br/> GCCATTGGCCTTGCACTTACCTGGCCACGTGCTGGCGCGGC</p>                                                                                                                                                                                                                                                                                                                                                                                                                                                                                                                                                                                                                                                                                                                                                                                                                                                                                                                                                 |

|                                                                       |        |                                                                                                                                                                                                                                                                                                                                                                                                                                                                                                                                                                                                                                                                                                                                                                                                                                      |
|-----------------------------------------------------------------------|--------|--------------------------------------------------------------------------------------------------------------------------------------------------------------------------------------------------------------------------------------------------------------------------------------------------------------------------------------------------------------------------------------------------------------------------------------------------------------------------------------------------------------------------------------------------------------------------------------------------------------------------------------------------------------------------------------------------------------------------------------------------------------------------------------------------------------------------------------|
|                                                                       |        | AAGGGTTCGTGGTGGTGGCGGTTGTGCACCCGGGGGACAAC<br>GTGCGCGACCACAGTCGCCTTGGCACCCCTGAGCAACCTTTAT<br>GGACGGCCGCTACAACCTCAGCGCGGCGATCACCCGAGCGCG<br>CGCTGATAGGGTGGTGGGCTTATCTGAACGAAGGCAAGGT<br>GGGGGTTATCGGCTACTCGGCCGGCGGAGAAACCGCGTTGA<br>TCCTGTCTGGTGCACGCCCCGATCTGGACCGTCTGCGTCAGT<br>ACTGCCTGGAGCGCCCGAAGGACGCGAGCCCTGCAAAACC<br>CACGGCATACTGATTGCCGACCGCAGCGAACTGGCGCCGCTGAG<br>ACCGACCCGCGAGTGGGGCGGTCATGTTGATGGCGCCGCT<br>GAGCCTGTTGTTGGGGCGCCATGCCTGGCCGGGGTACAGG<br>TACCCGTGCTGATCTACAGTGGCGACAGCGATCAGCTTGTGG<br>CTGTGGACCGTAATGCCGAGGCCCTGGCCCGAAACTGCCG<br>GTCACACCGGACTACCGCCTGTTGGCCGGTGGCGGGCACTTC<br>GTATTCATGGCCCGTTGCGATGCCGAGCAGTACGCGCGGATG<br>GCAGCGCTGTGCAAGGATGCCGATGGCGTCGACCGCCGCA<br>TATCCATCGCTCGCTGCAGCGAGAAACGGCGGGCTTCTCAG<br>CCAGGCGCTGGGTGCGCCAGCGCCGGCTGAGCGTTCAGCTG<br>CGACGGGCGCGCCGCGCCAGCAACAACGTCTCGAG |
| <i>PBHETase 1 (P_005068)</i>                                          | 348 AA | MTIARCVLALVLLGLLVRAEAPWVAGLHMLTLDPVDSRPMQ<br>ALAFYPAIGKTRRSRIDGYPVDVAEEAPVAMGRFLLVLSHGNTG<br>SPLALHYLATSRLARQGFVVAVVHPGDNRDHSRLGTLNLYGR<br>PLQLSAAITAARADRVVGPYLNEGKVGIGYSAGGETALILSGAR<br>PDLRLRQYCLERPKDADACKTHGILIADRSELAPETDPRVGAVM<br>LMAPLSLLFGRHALAGVQVPVLIYSGDSDLVAVDRNAEALARKL<br>PVTPDYRLLAGAGHFVFMARCDAEQYARMAALCKDADGVDRRH<br>IHRSLQRETAFFSQALGAPAPAERSAATGAPRQQQR                                                                                                                                                                                                                                                                                                                                                                                                                                                       |
| <i>PBHETase 1 codon optimized for expression in E.coli (P_005068)</i> | 330 AA | HMAPWVAGLHMLTLDPVDSRPMQALAFYPAIGKTRRSRIDGYP<br>VDVAEEAPVAMGRFLLVLSHGNTGSPLALHYLATSRLARQGFVV<br>VAVVHPGDNRDHSRLGTLNLYGRPLQLSAAITAARADRVVGP<br>YLNEGKVGIGYSAGGETALILSGARPDLRLRQYCLERPKDADA<br>CKTHGILIADRSELAPETDPRVGAVMLMAPLSLLFGRHALAGVQV<br>PVLIYSGDSDLVAVDRNAEALARKLPVTPDYRLLAGAGHFVMA<br>RCDAEQYARMAALCKDADGVDRRHHRSLQRETAFFSQALGA<br>PAPAERSAATGAPRQQQRLE                                                                                                                                                                                                                                                                                                                                                                                                                                                                        |

**Table S3: Confocal laser scanning microscope (CLSM) settings for LIVE/DEAD staining with propidium iodide and SYTO™ 9.** The table includes laser wavelengths, detector ranges, and other microscope parameters used for the detection of live and dead cells.

| Parameter           | Value            |         |
|---------------------|------------------|---------|
|                     | Propidium iodide | SYTO™ 9 |
| Gamma value         | 1.0              | 1.0     |
| Pinhole [μm]        | 46               | 46      |
| Detector digital    | 1.0              | 1.0     |
| Laser intensity [%] | 0.2              | 0.2     |
| Laser λ [nm]        | 561              | 488     |
| Detector λ [nm]     | 560-700          | 410-560 |
| Detector gain [V]   | 663              | 685     |

**Table S4. Primers used in this study for enzyme target amplification and /or SDM (site directed mutagenesis).**

| Plasmid/ Protein                         | Purpose                           | Forward                                                          | Reverse                                                                        |
|------------------------------------------|-----------------------------------|------------------------------------------------------------------|--------------------------------------------------------------------------------|
| pRS1993/<br>ABHETase2/<br>JHONJODE_01413 | Amplification from<br>gDNA<br>SDM | 5'-GCGCATATGGCGAATGAA<br>CAGACC-3'                               | 5'-GCGCTCGAGTTTTGCAGTCTC<br>C-3'                                               |
| pRS2108/<br>ABHETase1/<br>JHONJODE_02731 | Amplification from<br>gDNA<br>SDM | -<br>5'-TGTGGCAGTGACAGCAGC<br>-3'                                | -<br>5'-CATATGTATATCTCCTTCTTAAA<br>GTAAAC-3'                                   |
| pRS2109/<br>ABHETase3/<br>JHONJODE_00892 | Amplification from<br>gDNA<br>SDM | 5'-GCGCATATGCTCAAGCAG<br>GTCCC-3'<br>5'-TGCGGTGGCTCATCGTC-<br>3' | 5'-CGCTCGAGGTCACTCAGCACA<br>CTGC-3'<br>5'-CATATGTATATCTCCTTCTTAAA<br>GTAAAC-3' |
| pRS2110/<br>PBHETase1/<br>_005068        | Amplification from<br>gDNA<br>SDM | 5'-CTAGCATATGACCATTGCA<br>CGCTGCC-3'<br>5'-GCGCCGTGGGTTGCCG-3'   | 5'-GTCCTCGAGACGTTGTTGCT<br>GGCGC-3'<br>5'-CATATGTATATCTCCTTCTTAAA<br>GTAAAC-3' |

**Table S5. Strains and plasmids used in this study.**

| Strain/Plasmid                 | Genotype/Relevant Characteristics | Source/Reference            |
|--------------------------------|-----------------------------------|-----------------------------|
| <i>E. coli</i> DH5α            | General cloning strain            | (Miller and Mekalanos 1988) |
| <i>E. coli</i> BL21 (DE3)/pRIL | General expression strain         | Stratagene, La Jolla, USA   |
| pET21a(+)                      | General expression vector         | Novagen, Darmstadt, Germany |
| pRS1993                        | pET21a(+)_ABHETase2               | This study                  |
| pRS2108                        | pET21a(+)_ABHETase1               | This study                  |
| pRS2109                        | pET21a(+)_ABHETase3               | This study                  |
| pRS2110                        | pET21a(+)_PBHETase1               | This study                  |

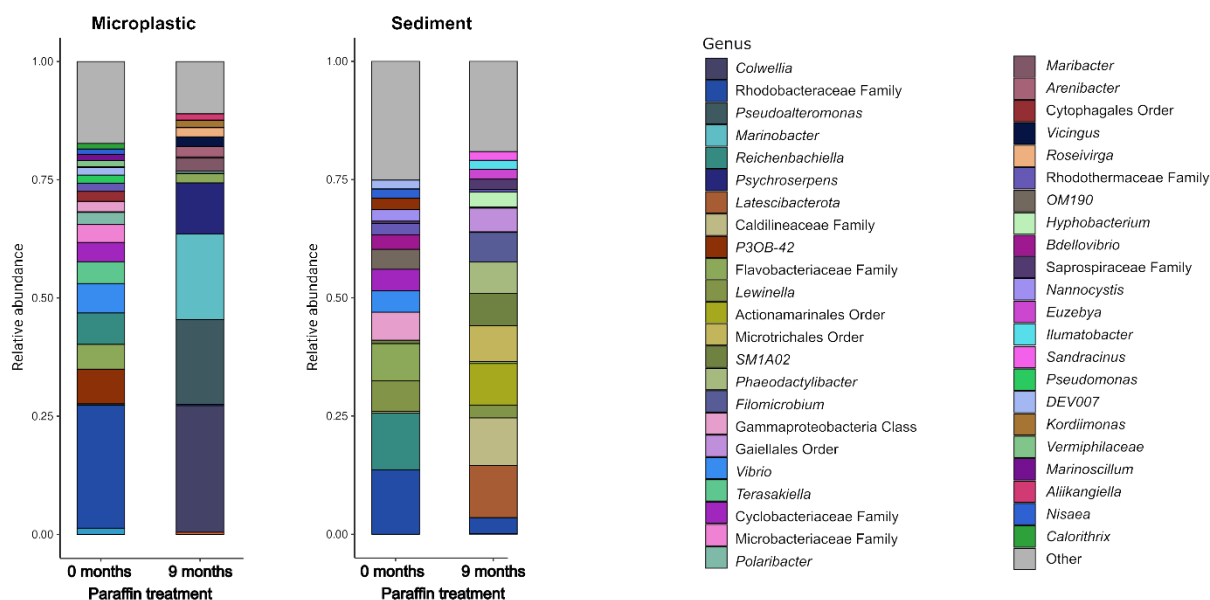

**Figure S1. Abundant bacterial genera in marine samples before and after enrichment.** ASV abundance is based on the V1-V2 region of the 16S rRNA gene, comparing bacterial communities deriving from microplastic samples or from oil contaminated sediment before and after enrichment with paraffin. Relative abundances of the thirty most abundant genera originating from each sample type were plotted as stacked bar charts. Genera lacking taxonomic assignment are presented at the lowest possible taxonomic rank.

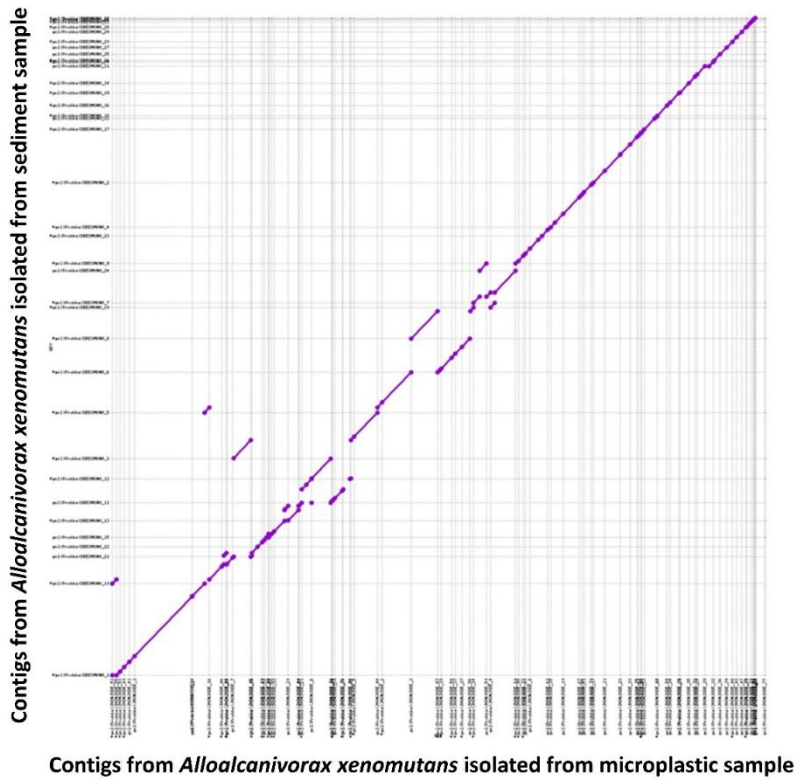

**Figure S2. Comparative genomic analysis of *A. xenomutans* isolates.** Pangenomic analysis comparing the two *Alloalcanivorax* isolates from this study with 19 reference genomes from the *Alcanivorax*, *Alloalcanivorax*, and *Isoalcanivorax* genera. The analysis highlights the core and accessory genome components, illustrating the genetic relationships and distinctions among these species. Distinct clusters corresponding to each genus show the genetic diversity within and between these groups.

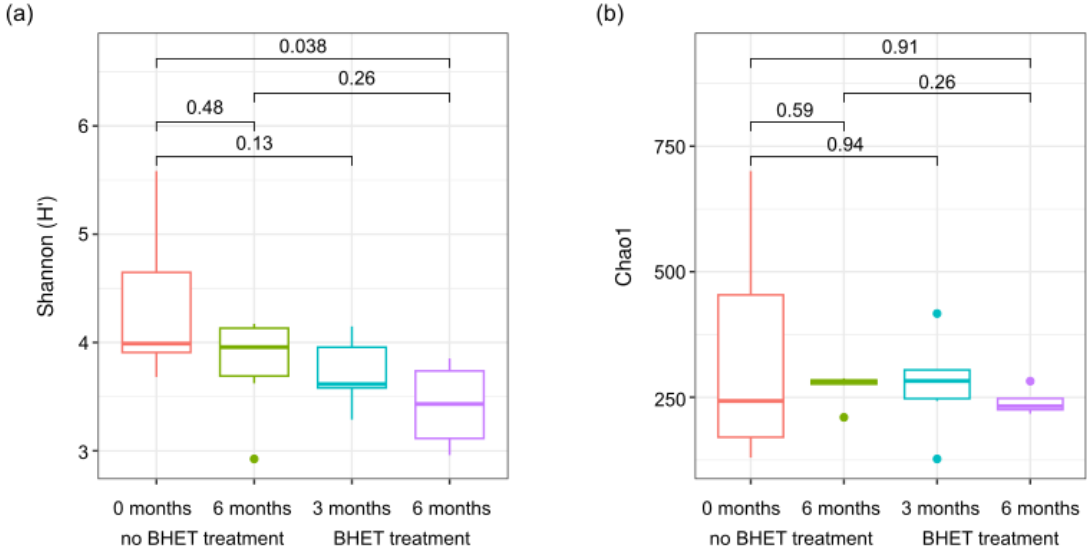

**Figure S3. Diversity analysis of *A. aurita* polyp microbiota during BHET treatment.** Polyps were treated with 0.1 % BHET for six months, and their microbiota were sampled after three (blue) and six months (purple) for 16S rRNA gene amplicon sequencing. (a) Shannon diversity ( $H'$ ) and (b) Chao1 richness indices were calculated using the vegan package (Oksanen *et al.* 2022) within the ampvis2 package (Andersen *et al.* 2018). Statistical significance of differences in diversity was assessed using the Kruskal-Wallis test and pairwise Wilcoxon test, implemented in the ggpubr package (Kassambara 2023). Two untreated controls were implemented both after zero (orange) and after six months (green).

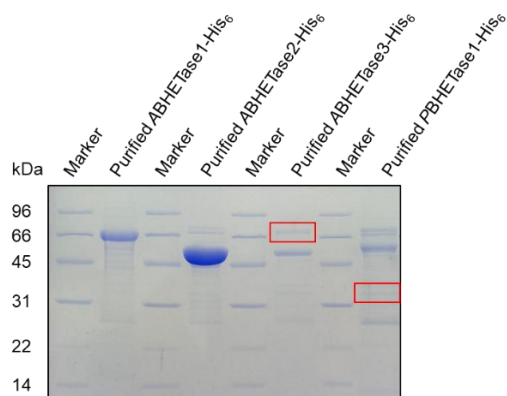

**Figure S4. Purification of BHETases.** Coomassie-stained SDS-PAGE analysis of heterologously expressed and purified His-tagged BHETases. Proteins were overexpressed in *E. coli* BL21 (DE3)-Codonplus-RIL, induced with 100  $\mu$ M IPTG in LB medium, and purified using Ni-NTA chromatography. ABHETase3-His<sub>6</sub> and PBHETase1-His<sub>6</sub> are only partially purified, the box indicates the the respective protein. Marker, low molecular weight, from the Amersham LMW Calibration Kit for SDS Electrophoresis

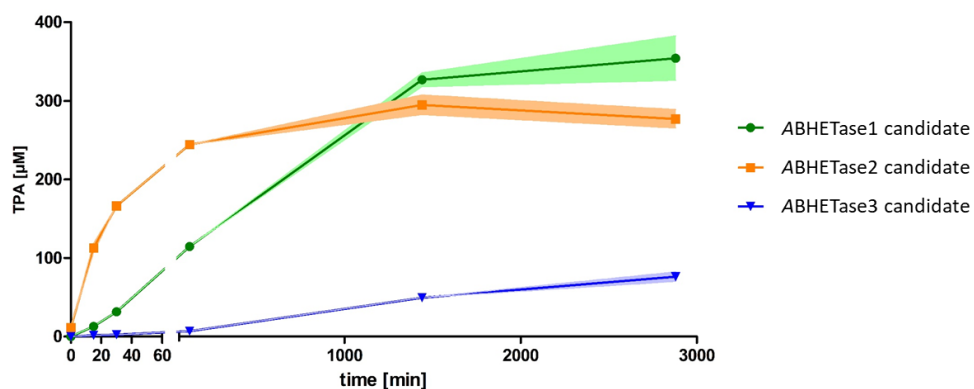

**Figure S5. ABHETase2 degrades BHET more effectively than ABHETase1 and ABHETase3.** BHET degradation was measured at 30°C for ABHETase1 and 40°C for ABHETase2-3. Enzyme amounts used were 0.1  $\mu$ g for ABHETase1, 0.25  $\mu$ g for ABHETase2, and 0.03  $\mu$ g for ABHETase3. TPA release was analyzed by reverse-phase UHPLC as described in Materials and Methods. TPA release due to autohydrolysis at each temperature was subtracted at each time point. Shaded areas indicate standard deviation from three technical replicates.
